# Supplementary material for: Preparation of poly(lactic-acid)-particle stabilized liquid marble and the improvement of its stability by uniform shell formation through solvent vapor exposure
Source: Royal Society of Chemistry journal article supplement (doi:10.1039/c3ra40693h), 2013-01-01
Supplement: c3ra40693h.pdf [file c3ra40693h.pdf]

Supporting Information for Manuscript Entitled with

## **Preparation of Poly(lactic-acid)-particle stabilized Liquid Marble and the Improvement of Its Stability by Uniform Shell Formation Upon Solvent Vapor Exposure**

*By Daisuke Matsukuma, Hirohmi Watanabe, Myo Minn, Aya Fujimoto, Takamichi Shinohara, Hiroshi Jinnai and Atsushi Takahara*

*Japan Science and Technology Agency, ERATO, Takahara Soft Interfaces Project, CE80, Kyushu University, 744 Motoooka, Nishi-ku, Fukuoka 819-0395, Japan*

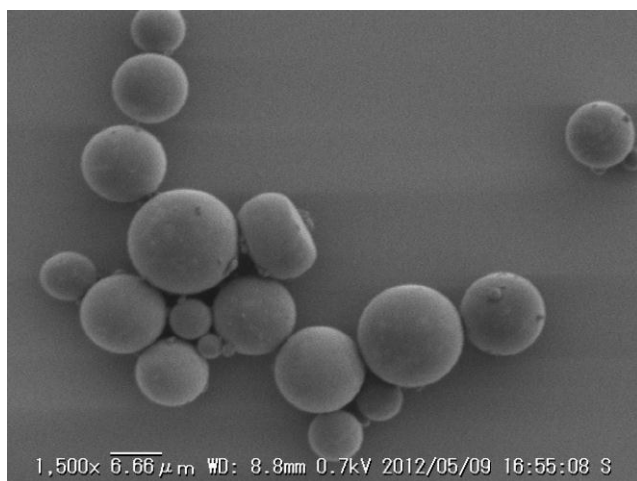

**Fig. S1** SEM photograph of PLA microparticles which are dispersed on a Si substrate.

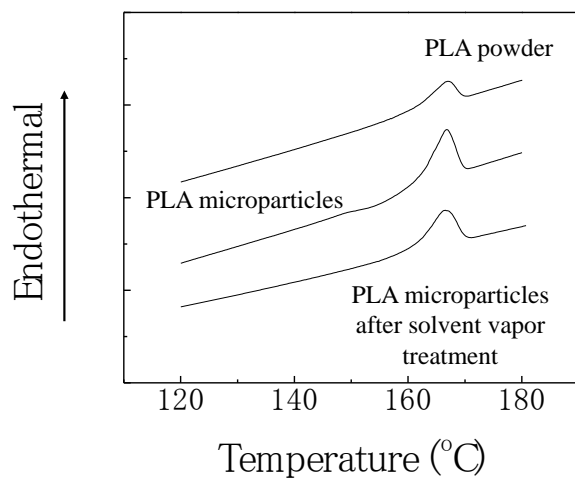

**Fig. S2** DSC raw data of PLA before microparticulation, PLA microparticles, and PLA microparticles after solvent vapor treatment.

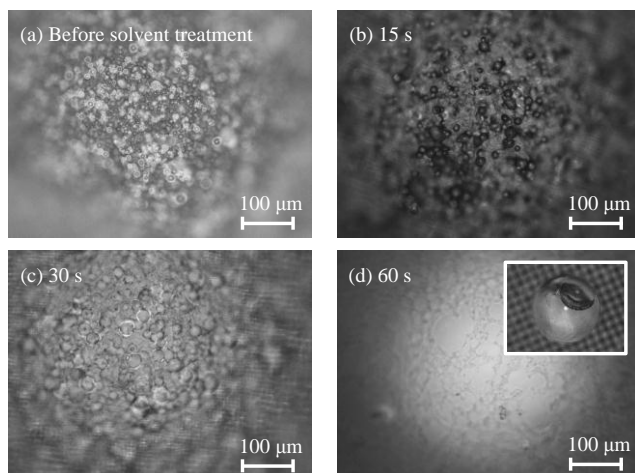

**Fig. S3** Optical microscopic images of the PLA shell layer: (a) before solvent vapor treatment, and after treating for (b) 15 s, (c) 30 s, and (d) 60 s (inset: over-roll view of the liquid marble).

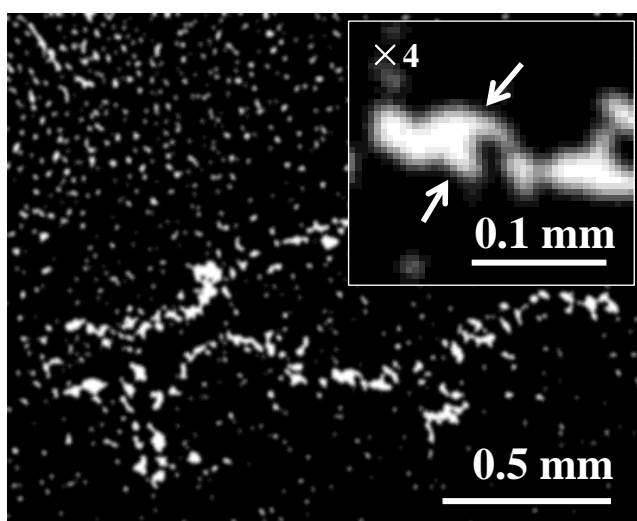

**Fig. S4** Cross-sectional image of PLA without solvent vapor treatment (inset: magnified image of the PLA shell layer).

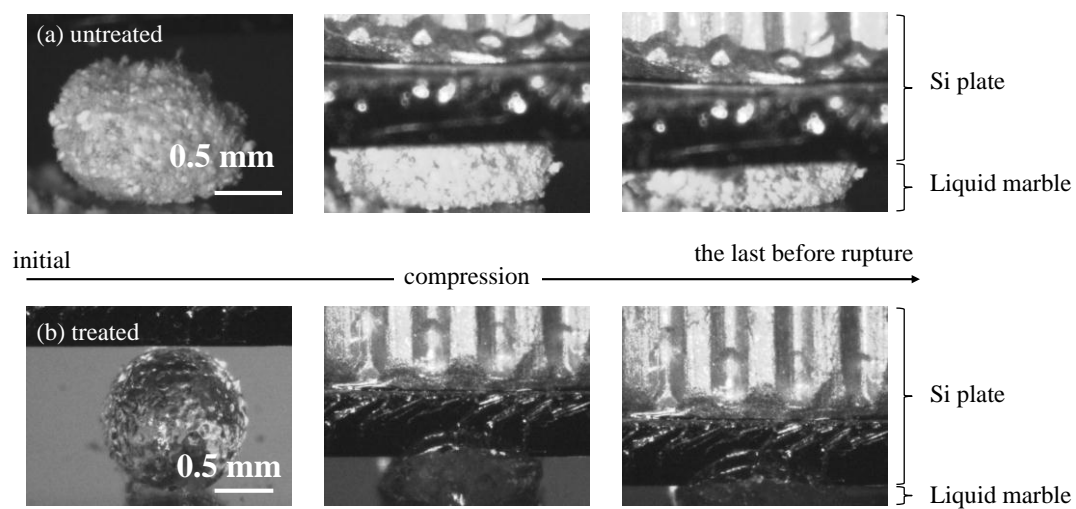

**Fig. S5** Side-views of liquid marbles during the compression.
